# Supplementary material for: DOCK2-deficiency causes defects in anti-viral T cell responses and poor control of herpes simplex virus infection
Source: PubMed Central journal article supplement — bioRxiv. 2023 Aug 3:2023.08.02.551154. Preprint. [Version 1] doi: 10.1101/2023.08.02.551154 (PMC10418165; doi:10.1101/2023.08.02.551154), 2023-08-03
Supplement: media-1.pdf [file media-1.pdf]

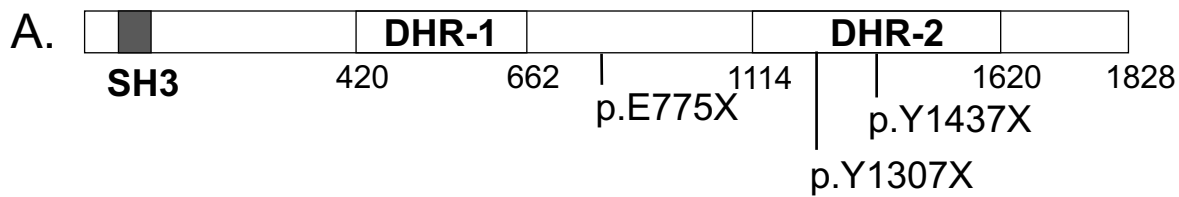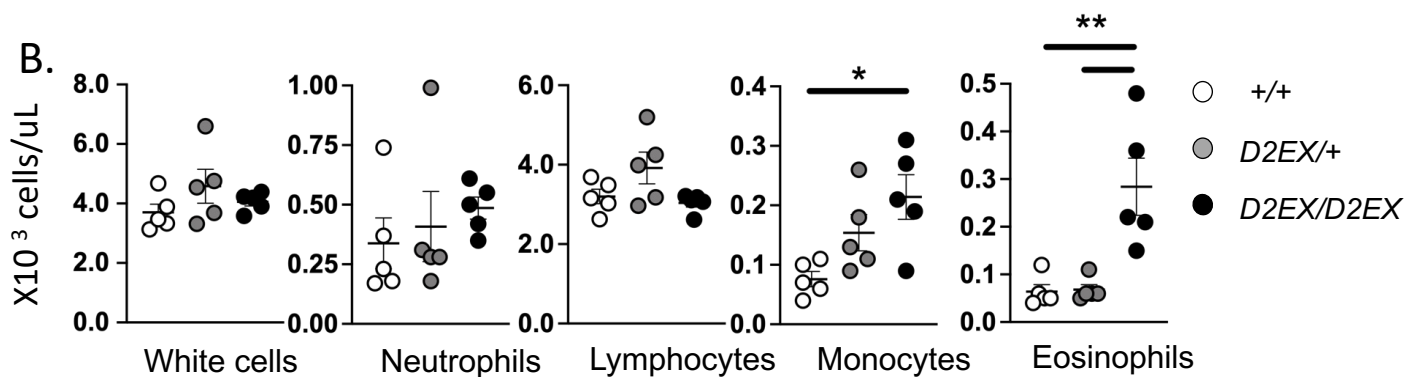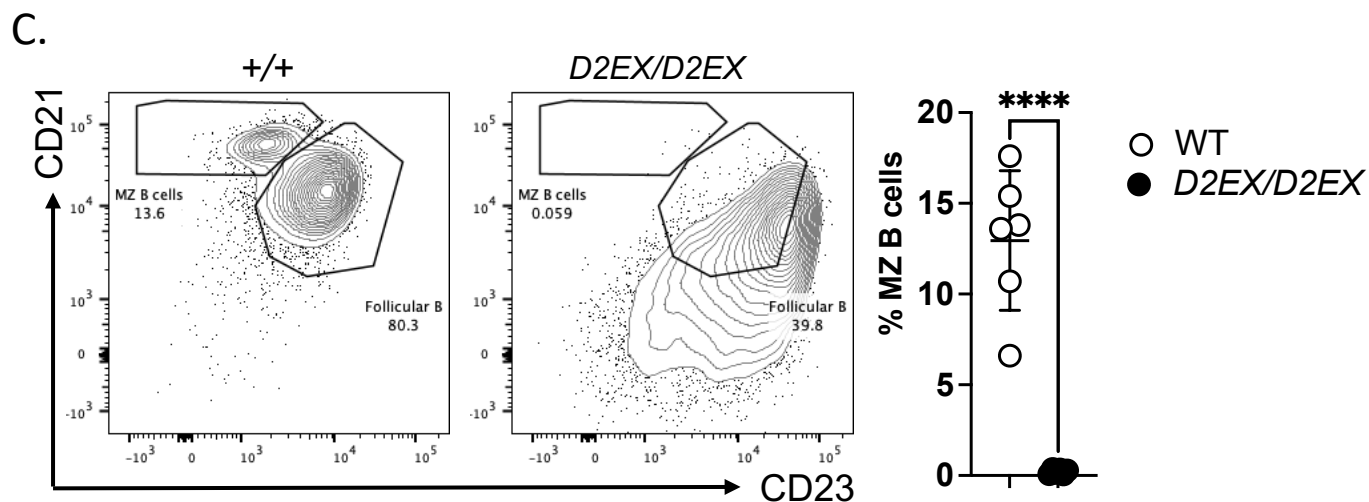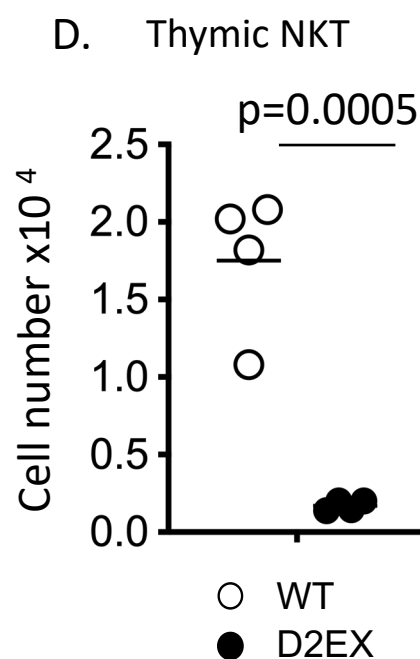

**Supplementary Figure 1:**

- Graphical representation of the DOCK2 protein structure indicating the sites of the ENU-induced mutations
- Quantification of the white cell count and differential in the peripheral blood for wild type, heterozygous and mutant mice. Statistical analysis by one way ANOVA with Tukey's multiple comparison test. \* $<0.05$ , \*\* $<0.005$
- Representative flow cytometry plots (left) and quantitation (right) of marginal zone B cells in the spleen of wild type (white) and mutant (black) mice. Statistical analysis was done by unpaired t-test. \*\*\*\* $p<0.0001$ .
- Number of thymic NKT cells. Dots represent individual mice, and the mean is indicated by the bar. Statistical analysis by unpaired t-test.
