# Supplementary material for: DOCK2-deficiency causes defects in anti-viral T cell responses and poor control of herpes simplex virus infection
Source: PubMed Central journal article supplement — bioRxiv. 2023 Aug 3:2023.08.02.551154. Preprint. [Version 1] doi: 10.1101/2023.08.02.551154 (PMC10418165; doi:10.1101/2023.08.02.551154), 2023-08-03
Supplement: media-2.pdf [file media-2.pdf]

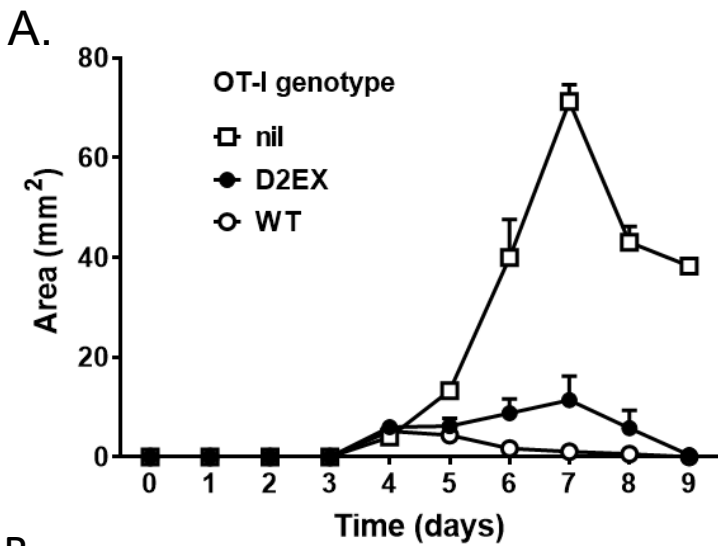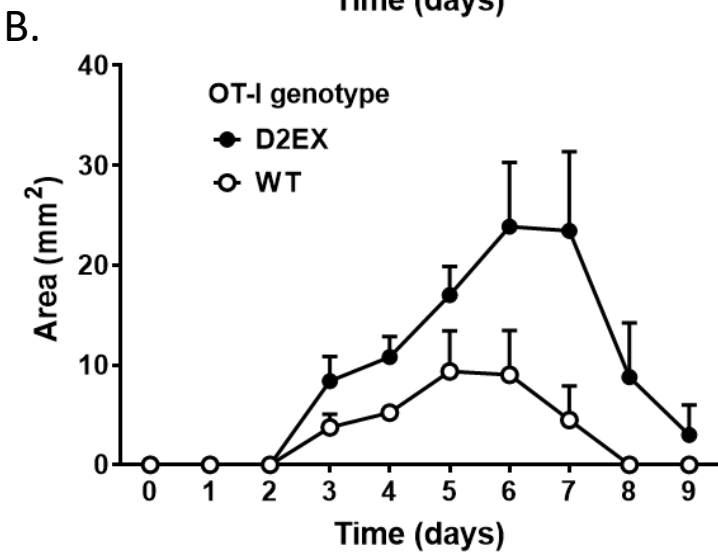

**Supplementary Figure 2. Progression of lesions following HSV infection.**

Progression of lesions in B6 mice that  $5 \times 10^6$  received OT-I T cells of the indicated genotype 24 hr before tattoo-infection with HSV.OVA pC-GIP. 2 separate experiments with 4-7 mice per group and experiment.
